# Supplementary material
Source: PubMed Central journal article supplement (PMC1838452)

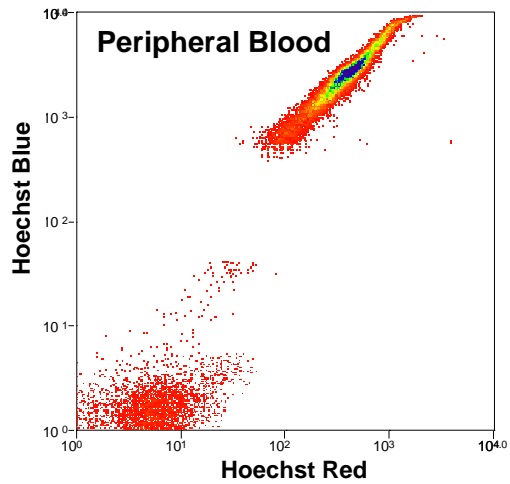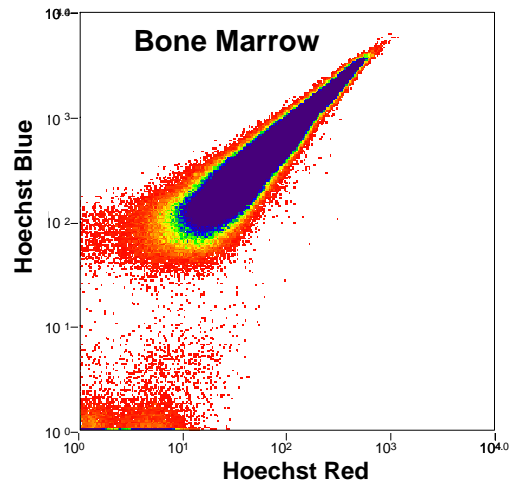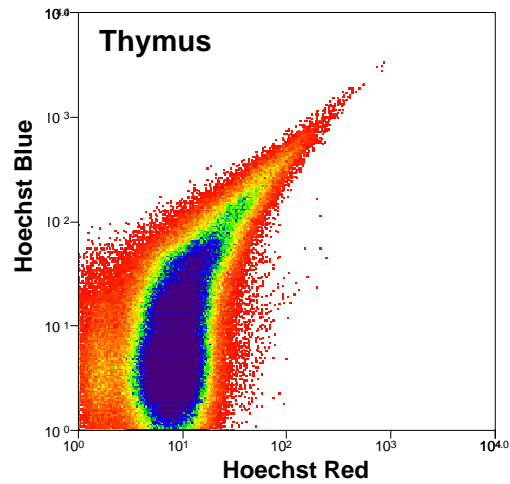

Supplement: pnas_0701152104_1.pdf [file pnas_0701152104_1.pdf]

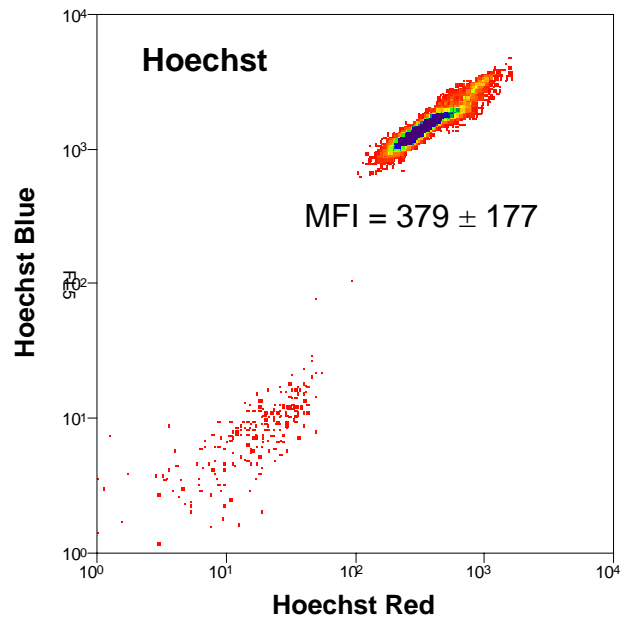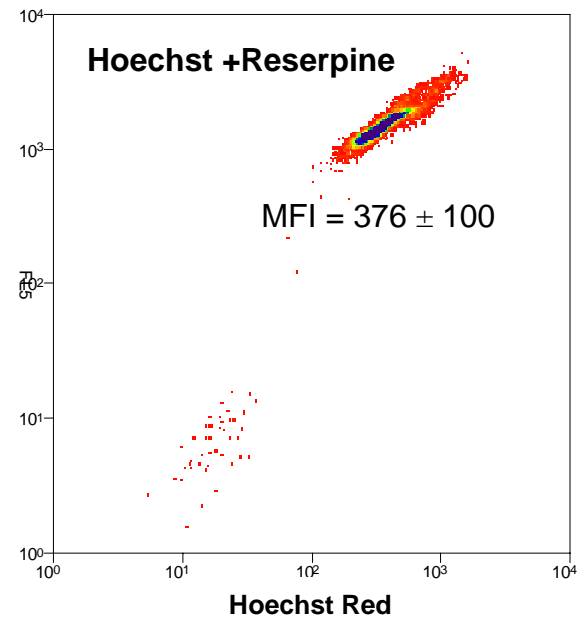

Supplement: pnas_0701152104_2.pdf [file pnas_0701152104_2.pdf]

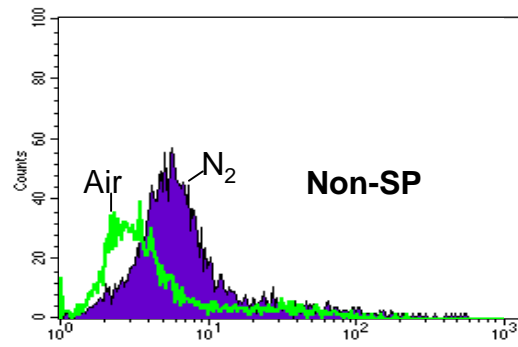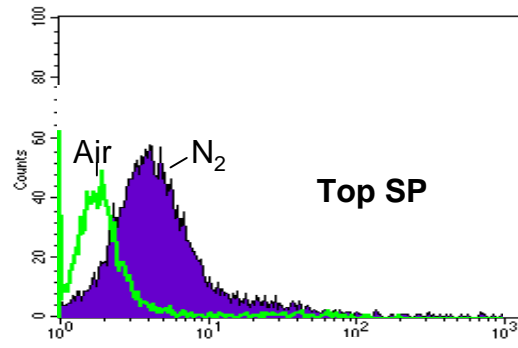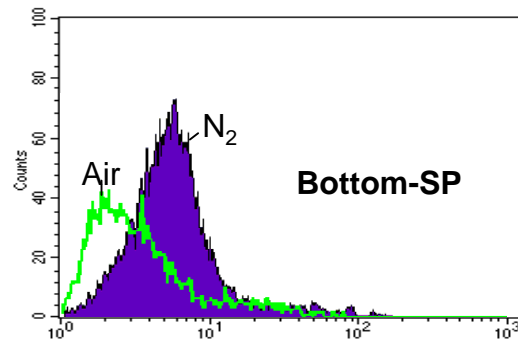

Anti-pimonidazole Ab + 2<sup>o</sup> Ab-AF488

Supplement: pnas_0701152104_3.pdf [file pnas_0701152104_3.pdf]

**A**

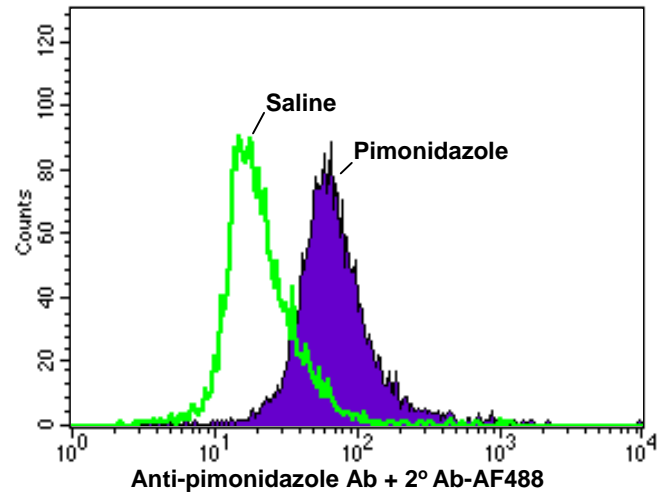

**B**

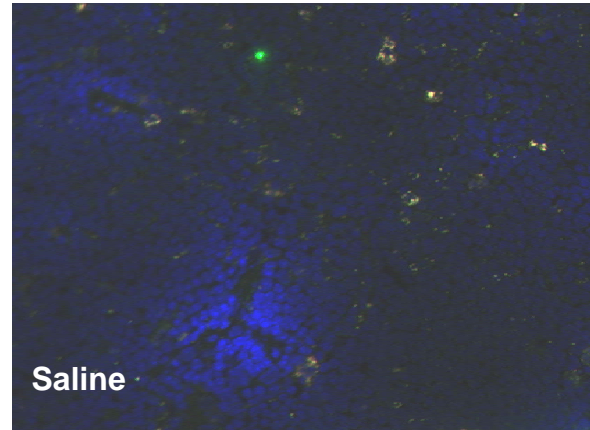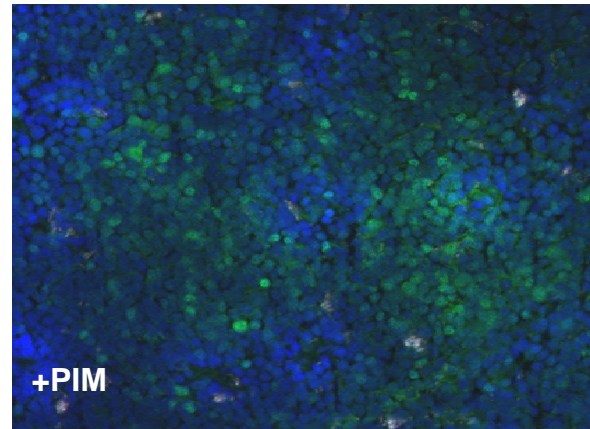

Supplement: pnas_0701152104_4.pdf [file pnas_0701152104_4.pdf]

**Saline Control**

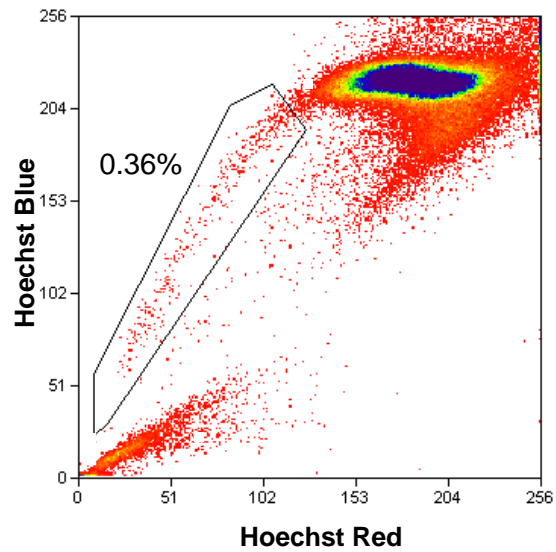

**4 x 30 mg/kg TPZ**

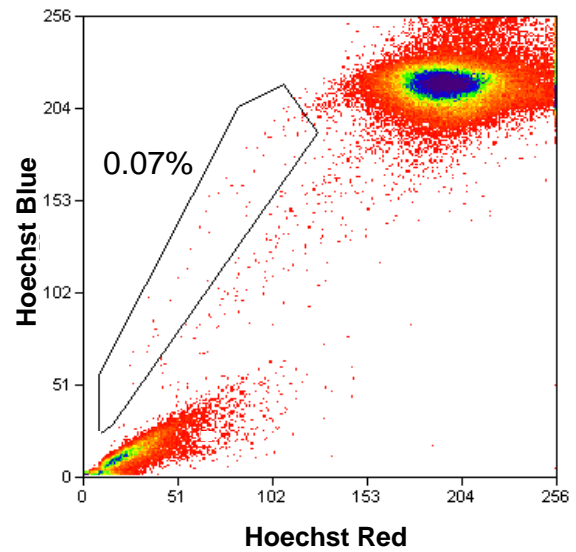

Supplement: pnas_0701152104_5.pdf [file pnas_0701152104_5.pdf]

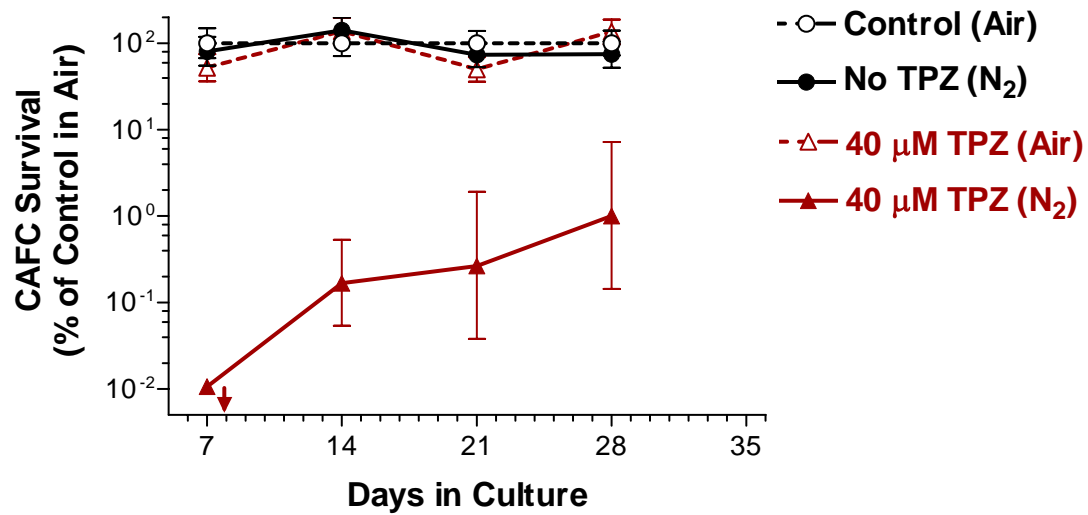

Supplement: pnas_0701152104_6.pdf [file pnas_0701152104_6.pdf]
